# Supplementary material
Source: publisher site journal article supplement (https://www.dovepress.com/article/582222)
Supplement: Supplementary file 1 [file 582222%20Supplementary%20Figure%201.docx]

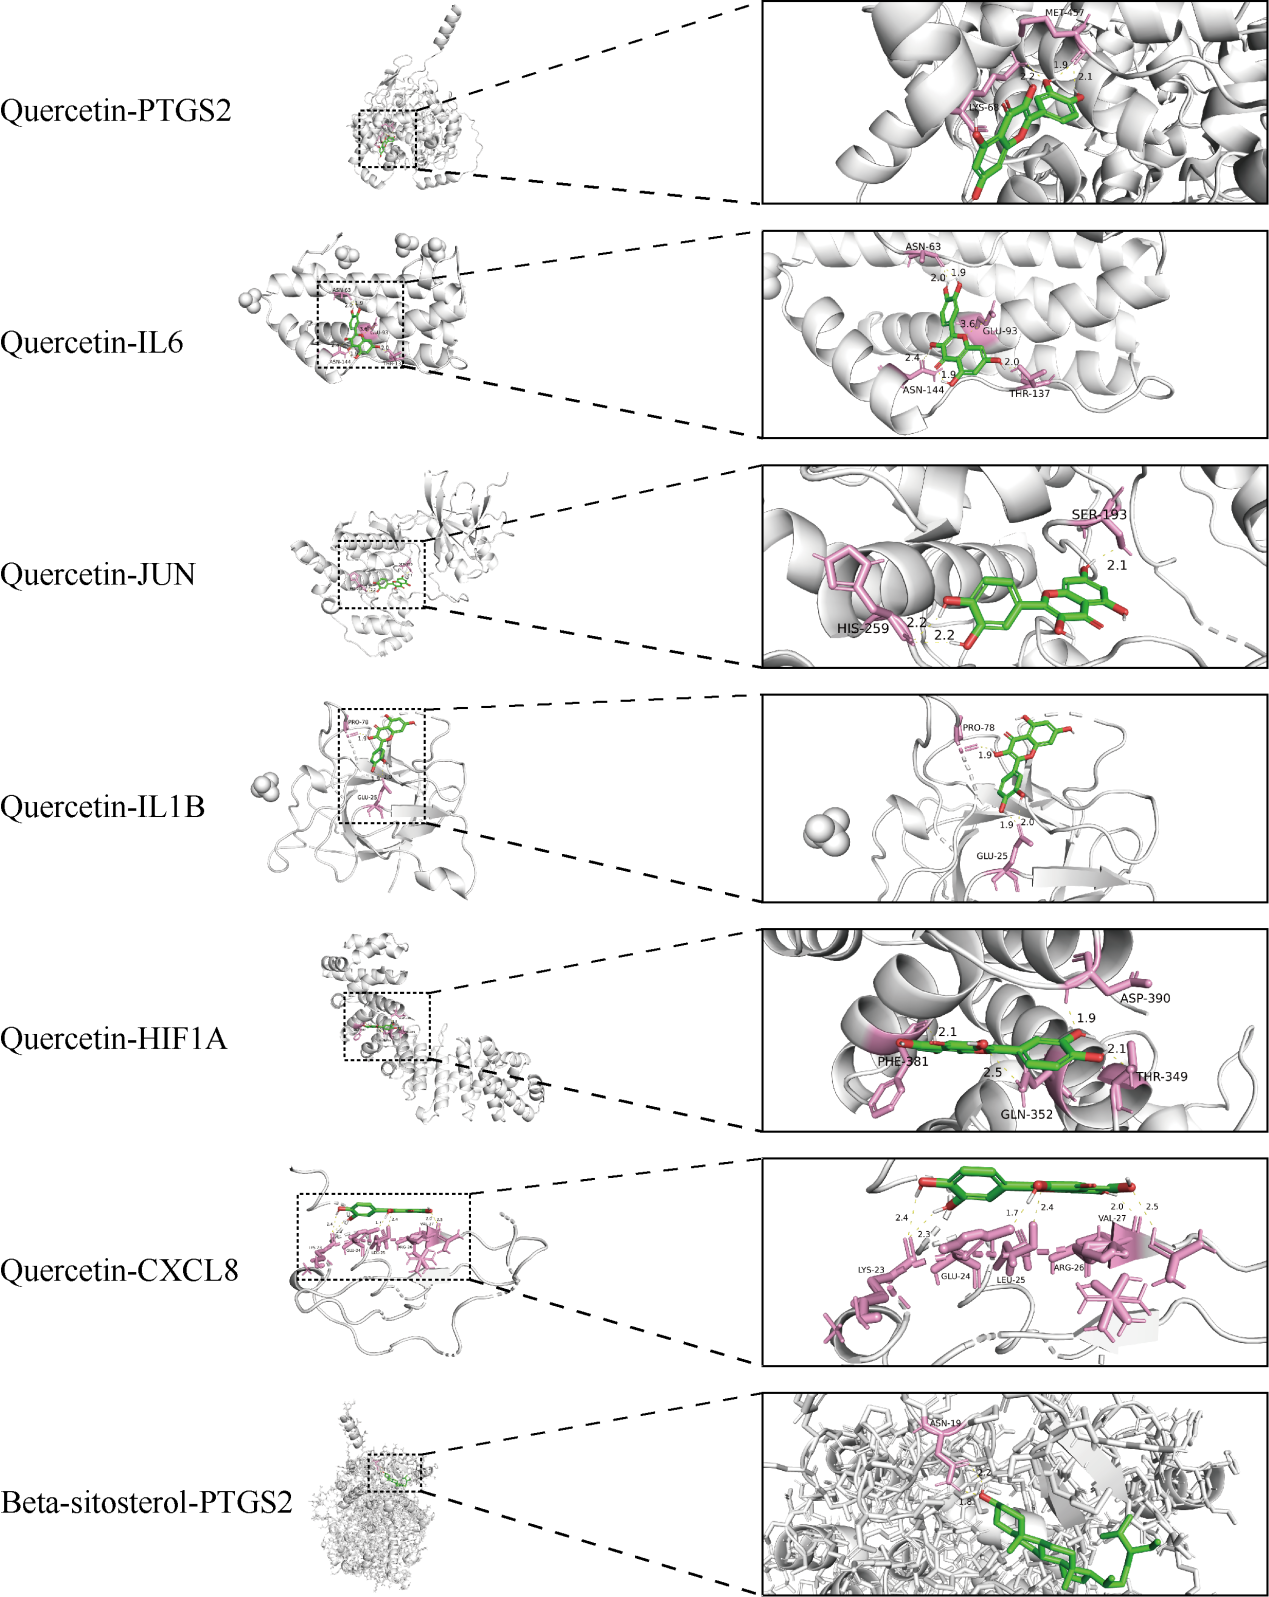


Figure S1 Predicted hydrogen bonding interactions between the hit compounds and core target proteins. Representative docking conformations are shown for quercetin with PTGS2, IL-6, JUN, IL-1β, HIF1A, and CXCL8, and for β-sitosterol with PTGS2. Hydrogen bonds are represented as yellow dashed lines with distances labeled in angstroms (Å). Key amino acid residues involved in hydrogen bonding are indicated.
